# Supplementary material for: Training in Honey Bee Veterinary Medicine in Italy: An Observational Study and Practical Proposals to Face Professional Challenges
Source: MDPI journal article supplement (doi:10.3390/ani13111795), 2023-05-29
Supplement: s1 [file s1]

Supplementary Table S1. Web addresses of Universities and Veterinary Departments

| Acronym | web address                                                 | Name                                                    | web address                                                                                                                                                                                                     |
|---------|-------------------------------------------------------------|---------------------------------------------------------|-----------------------------------------------------------------------------------------------------------------------------------------------------------------------------------------------------------------|
| UNIME   | <a href="https://www.unime.it/">https://www.unime.it/</a>   | Department of Veterinary Sciences                       | <a href="https://archivio.unime.it/it/dipartimenti/vet">https://archivio.unime.it/it/dipartimenti/vet</a>                                                                                                       |
| UNIBA   | <a href="https://www.uniba.it/">https://www.uniba.it/</a>   | Department of Veterinary Medicine                       | <a href="https://www.uniba.it/it/ricerca/dipartimenti/dipmedveterinaria">https://www.uniba.it/it/ricerca/dipartimenti/dipmedveterinaria</a>                                                                     |
| UNINA   | <a href="http://www.unina.it/">http://www.unina.it/</a>     | Department of Veterinary Medicine and Animal Production | <a href="https://www.mvpa-unina.org/">https://www.mvpa-unina.org/</a>                                                                                                                                           |
| UNISS   | <a href="https://www.uniss.it/">https://www.uniss.it/</a>   | Department of Veterinary Medicine                       | <a href="https://veterinaria.uniss.it/it">https://veterinaria.uniss.it/it</a>                                                                                                                                   |
| UNITE   | <a href="https://www.unite.it/">https://www.unite.it/</a>   | Department of Veterinary Medicine                       | <a href="https://www.unite.it/UniTE/Home/Medicina_veterinaria">https://www.unite.it/UniTE/Home/Medicina_veterinaria</a>                                                                                         |
| UNIPG   | <a href="https://www.unipg.it/">https://www.unipg.it/</a>   | Department of Veterinary Medicine                       | <a href="https://medvet.unipg.it/">https://medvet.unipg.it/</a>                                                                                                                                                 |
| UNICAM  | <a href="https://www.unicam.it/">https://www.unicam.it/</a> | School of Biosciences and Veterinary Medicine           | <a href="https://veterinaria.unicam.it/it">https://veterinaria.unicam.it/it</a>                                                                                                                                 |
| UNIFI   | <a href="https://www.unifi.it/">https://www.unifi.it/</a>   | Department of Veterinary Sciences                       | <a href="https://www.vet.unifi.it/">https://www.vet.unifi.it/</a>                                                                                                                                               |
| UNIBO   | <a href="https://www.unibo.it/">https://www.unibo.it/</a>   | Department of Veterinary Medical Sciences               | <a href="https://scienzemedicheveterinarie.unibo.it/">https://scienzemedicheveterinarie.unibo.it/</a>                                                                                                           |
| UNIPR   | <a href="https://www.unipr.it/">https://www.unipr.it/</a>   | Department of Veterinary Sciences                       | <a href="https://smv.unipr.it/">https://smv.unipr.it/</a>                                                                                                                                                       |
| UNITO   | <a href="https://www.unito.it/">https://www.unito.it/</a>   | Department of Veterinary Sciences                       | <a href="https://www.veterinaria.unito.it/">https://www.veterinaria.unito.it/</a>                                                                                                                               |
| UNIMI   | <a href="https://www.unimi.it/">https://www.unimi.it/</a>   | Department of Veterinary Medicine and Animal Sciences   | <a href="https://www.unimi.it/it/ugov/ou-structure/dipartimento-di-medicina-veterinaria-e-scienze-animali">https://www.unimi.it/it/ugov/ou-structure/dipartimento-di-medicina-veterinaria-e-scienze-animali</a> |
| UNIPD   | <a href="https://www.unipd.it/">https://www.unipd.it/</a>   | Department of Animal Medicine, Production and Health    | <a href="https://maps.unipd.it/">https://maps.unipd.it/</a>                                                                                                                                                     |
